# Supplementary material
Source: HighWire-hosted journal article supplement (http://molpharm.aspetjournals.org/highwire/filestream/77282/field_highwire_adjunct_files/0/092536_supplemental_figures_revised.pdf)
Supplement: 092536_supplemental_figures_revised.pdf [file 092536_supplemental_figures_revised.pdf]

Supplemental data for MOL #92536, MOUSA ABKHEZR AND STUART E. DRYER, Angiotensin II and TRPC6 activation stimulate release of a STAT3-activating factor from mouse podocytes.

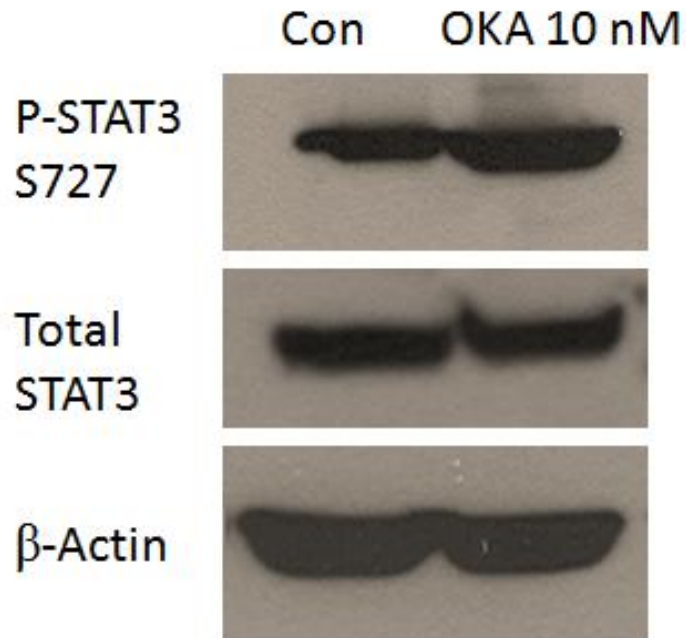

Supplemental Figure 1 (S1). Increase in phosphorylation of STAT3 at serine-727 observed after treating podocytes with okadaic acid, an inhibitor of serine-threonine protein kinases.

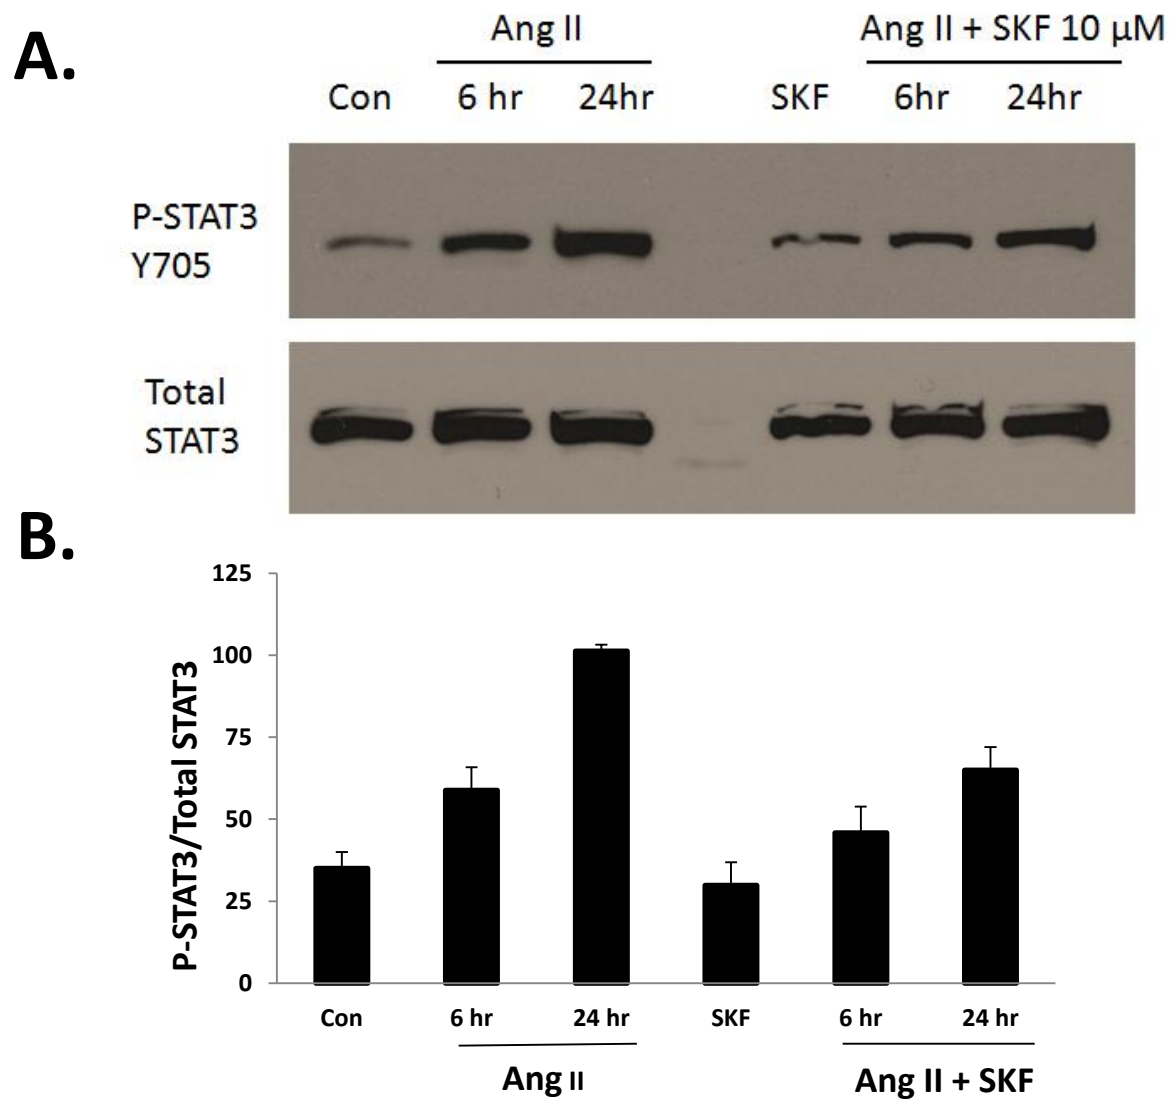

Supplemental Figure 2 (S2). Pan-TRP channel inhibitor SKF-96365 reduces Ang II-evoked STAT3 tyrosine phosphorylation in podocytes.

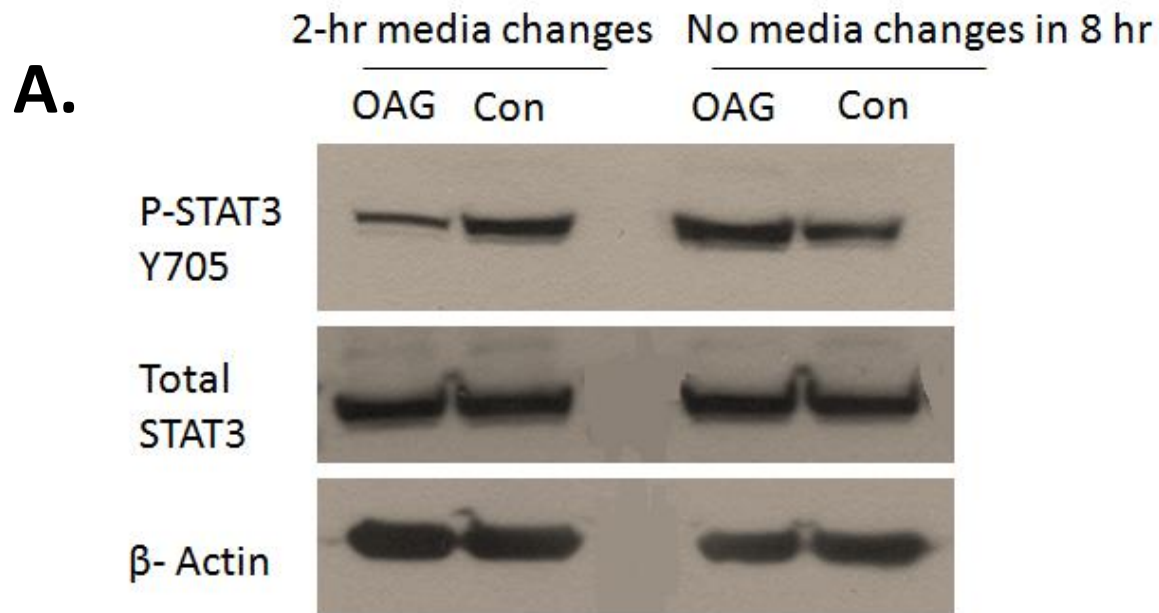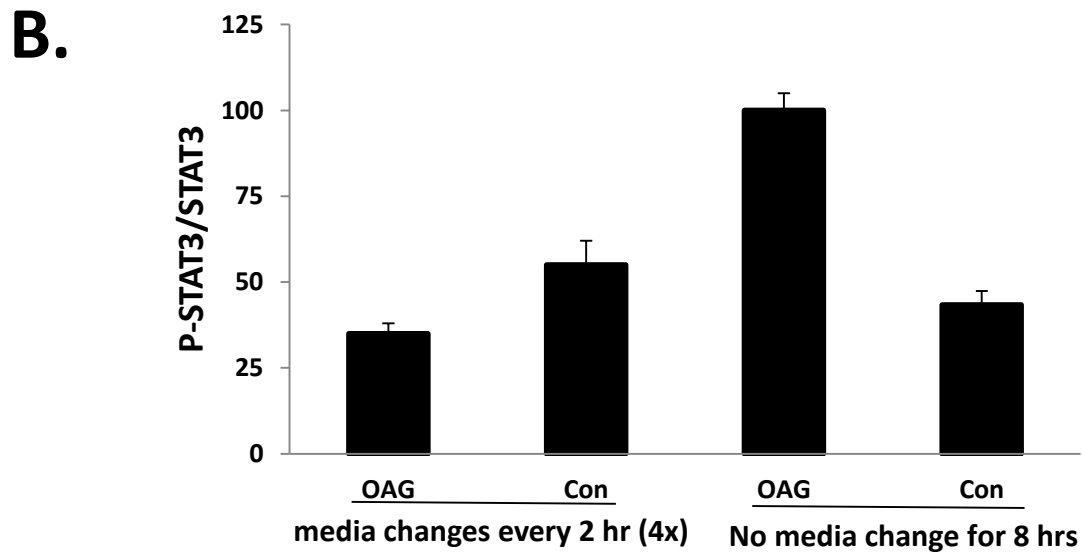

Supplemental Figure 3 (S3). Repeated medium changes eliminates STAT3 phosphorylation evoked by 8 hr exposure to OAG and uncovers an inhibitory effect.
